# Supplementary material
Source: PubMed Central journal article supplement (PMC2824276)
Supplement: 0909969107_pnas.200909969SI.pdf [file 0909969107_pnas.200909969SI.pdf]

# Supporting Information

Glahn et al. 10.1073/pnas.0909969107

**Table S1. Pedigree structure**

| Family relationship    | Number of pairs |
|------------------------|-----------------|
| Self                   | 333             |
| Parent–offspring       | 81              |
| Siblings               | 95              |
| Grandparent–grandchild | 11              |
| Avuncular              | 119             |
| Half-siblings          | 22              |
| Grand avuncular        | 11              |
| Half avuncular         | 20              |
| First cousins          | 153             |
